# Supplementary material for: Pharmacokinetic Alteration of Baclofen by Multiple Oral Administration of Herbal Medicines in Rats
Source: Hindawi journal article supplement (doi:10.1155/2014/402126), 2014-01-01
Supplement: f1 [file 402126.f1.pdf]

- 1 Supplementary Table 1. HPLC/DAD conditions of determination of representative standard
- 2 compounds in Oyaksungisan (OY) and *Achyranthes bidentata* radix (AB) extract.

| Conditions               | OY                                                  | AB                                                 |
|--------------------------|-----------------------------------------------------|----------------------------------------------------|
| HPLC                     | Waters 2690 Separation module                       |                                                    |
| Detector                 | Waters 2996 Photodiode Array Detector (PDA)         |                                                    |
| Column                   | Luna C <sub>18</sub> column (5 μm, 4.6 mm x 250 mm) |                                                    |
| Mobile phase             | 0 min, A <sup>a</sup> :B <sup>b</sup> = 80:20       | 0 - 40 min, C <sup>c</sup> :D <sup>d</sup> = 85:15 |
|                          | 10 min, A <sup>a</sup> :B <sup>b</sup> = 80:20      |                                                    |
|                          | 15 min, A <sup>a</sup> :B <sup>b</sup> = 65:35      |                                                    |
|                          | 30 min, A <sup>a</sup> :B <sup>b</sup> = 50:50      |                                                    |
|                          | 40 min, A <sup>a</sup> :B <sup>b</sup> = 35:65      |                                                    |
|                          | 60 min, A <sup>a</sup> :B <sup>b</sup> = 30:70      |                                                    |
| Flow rate                | 1 ml/min                                            | 1 ml/min                                           |
| Column temperature       | 35° C                                               | 40° C                                              |
| Injection volume         | 10 μl                                               | 20 μl                                              |
| UV detection wave length | 250, 280, 360 nm                                    | 245 nm                                             |

3 <sup>a</sup> 0.1% trifluoroacetic acid in water

4 <sup>b</sup> Methanol

5 <sup>c</sup> 0.1% formic acid in water

6 <sup>d</sup> Acetonitrile

7 Supplementary Table 2. The contents of representative standard compounds in Oyaksungisan  
 8 (OY) or *Achyranthes bidentata* radix (AB) extract.

| Herbal medicine                               | Compound       | Concentration (mg/g)* (n=3)  |
|-----------------------------------------------|----------------|------------------------------|
| Oyaksungisan granule                          | Glycyrrhizin   | 1.075 ± 0.008                |
|                                               | Naringin       | 0.226 ± 0.002                |
|                                               | Hesperidin     | 1.112 ± 0.007                |
|                                               | Neohesperidin  | 0.006 ± 0.000                |
|                                               | 6-Gingerol     | Below the limit of detection |
|                                               | Ferulic acid   | 0.043 ± 0.002                |
| <i>Achyranthes bidentata</i> radix<br>extract | Ecdysterone    | 0.691 ± 0.023                |
|                                               | R-Inokosterone | 0.503 ± 0.052                |
|                                               | S-Inokosterone | 0.457 ± 0.009                |

9 \*The concentration of each component is represented as milligram (mg) of each component  
 10 in gram (g) of Oyaksungisan (OY) granule or extracted *Achyranthes bidentata* Radix (AB)  
 11 powder.

12 Supplementary Figure 1. (A) Representative standard compounds and (B) HPLC fingerprint  
13 chromatograms of Oyaksungisan (OY) granule.  
14

### (A) Reference standards

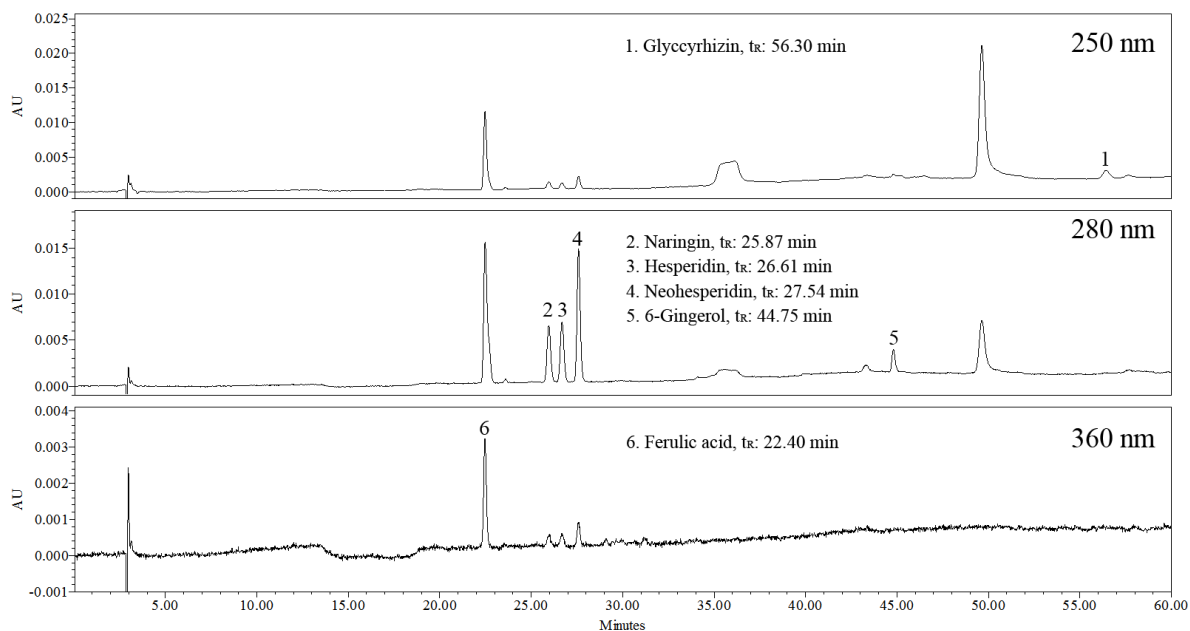

### (B) Oyaksungisan

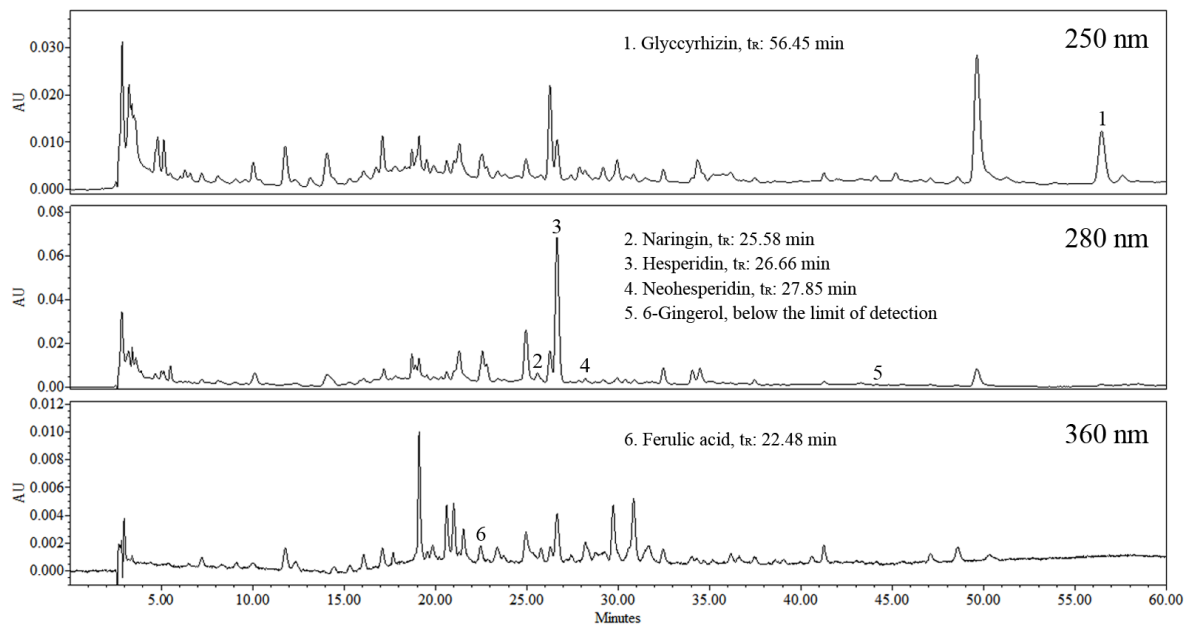

15

16

17 Supplementary Figure 2. (A) Representative standard compounds and (B) HPLC fingerprint  
18 chromatograms of *Achyranthes bidentata* radix (AB) extract.

### (A) Reference standards

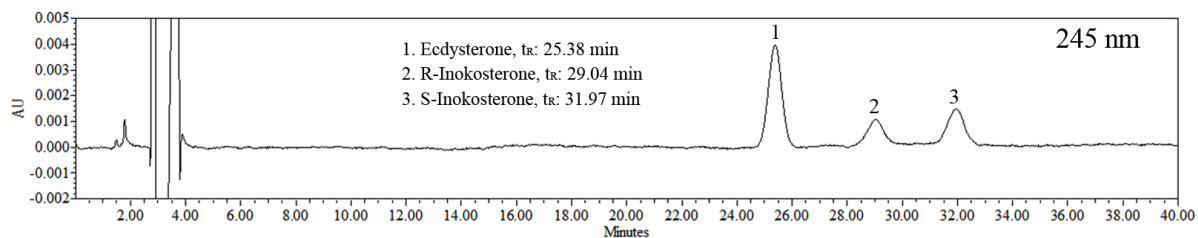

### (B) *Achyranthis radix* extract

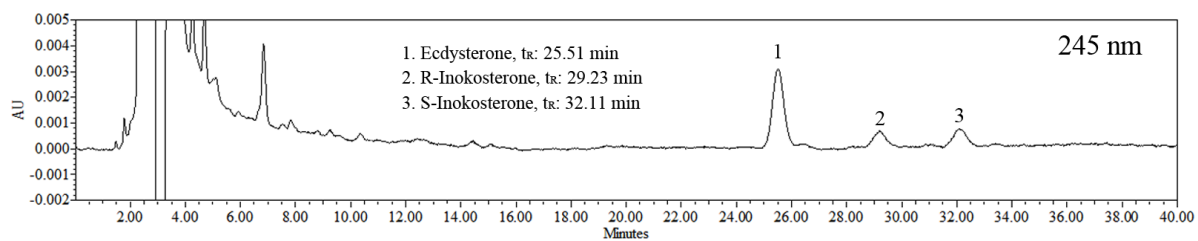

19
